# Supplementary material
Source: ML conference proceedings conference paper supplement (https://proceedings.neurips.cc/paper_files/paper/2021/hash/ffa4eb0e32349ae57f7a0ee8c7cd7c11-Abstract.html)
Supplement: Supplementary file 1 [file ffa4eb0e32349ae57f7a0ee8c7cd7c11-Supplemental.zip]

Archive with 4 entries (4 files):
- causal-bald-main.zip
- __MACOSX/._causal-bald-main.zip
- appendix.pdf
- __MACOSX/._appendix.pdf
